# Supplementary material for: Susceptibility profiles of Nocardia spp. to antimicrobial and antituberculotic agents detected by a microplate Alamar Blue assay
Source: PubMed Central journal article supplement (PMC5333629; doi:10.1038/srep43660), 2017-03-02
Supplement: srep43660-s1.pdf [file srep43660-s1.pdf]

**Susceptibility profiles of *Nocardia spp.* to antimicrobial and antituberculous agents detected by a microplate Alamar Blue assay**

Pan Zhao<sup>1¶</sup>, Xiujuan Zhang<sup>2¶</sup>, Pengcheng Du<sup>3¶</sup>, Guilian Li<sup>1</sup>, Luxi Li<sup>1</sup>, and Zhenjun Li<sup>1&</sup>

1. State Key Laboratory for Infectious Disease Prevention and Control, and National Institute for Communicable Disease Control and Prevention, Chinese Center for Disease Control and Prevention; Collaborative Innovation Center for Diagnosis and Treatment of Infectious Diseases, Beijing 102206, China

2. Department of Endocrinology, Beijing Chaoyang Hospital, Capital Medical University, Beijing 100020, China

3. Institute of Infectious Diseases, Beijing Ditan Hospital, Capital Medical University, Beijing Key Laboratory of Emerging infectious Diseases, Beijing 100015, China

<sup>¶</sup>These authors contributed equally to this work.

<sup>&</sup>Corresponding author

Prof. Zhenjun Li,

National Institute for Communicable Disease Control and Prevention, Chinese Center for Disease Control and Prevention

P.O. BOX 5, Changping, Beijing 102206, China

Tel/Fax: 00861058900760

E-mail: zhenjun3886@163.com

S1 Table. MIC breakpoints (mg/L) and concentration range of 14 antimicrobials according to the CLSI interpretive criteria<sup>10</sup>.

| Antimicrobial agents        | MIC breakpoints |              |           | Concentration range |
|-----------------------------|-----------------|--------------|-----------|---------------------|
|                             | Susceptible     | Intermediate | Resistant |                     |
| Amikacin                    | ≤8              |              | ≥16       | 64–0.125            |
| Amoxicillin-clavulanic acid | ≤8/4            | 16/8         | ≥32/16    | 32/16–0.25/0.125    |
| Ceftriaxone                 | ≤8              | 16–32        | ≥64       | 256–0.25            |
| Ciprofloxacin               | ≤1              | 2            | ≥4        | 256–0.25            |
| Clarithromycin              | ≤2              | 4            | ≥8        | 32–0.25             |
| Imipenem                    | ≤4              | 8            | ≥16       | 128–0.25            |
| Linezolid                   | ≤8              |              |           | 128–0.125           |
| Minocyclin                  | ≤1              | 2–4          | ≥8        | 256–0.125           |
| Tobramycin                  | ≤4              | 8            | ≥16       | 256–0.25            |
| Cefepime                    | ≤8              | 16           | ≥32       | 32–0.125            |
| Cefotaxime                  | ≤8              | 16–32        | ≥64       | 256–0.125           |
| Doxycycline                 | ≤1              | 2–4          | ≥8        | 256–0.125           |
| Ampicilin                   | ≤8              | 16           | ≥32       | 128–0.125           |
| Gentamicin                  | ≤4              | 8            | ≥16       | 256–0.25            |

Table S2. MIC<sub>50</sub>, MIC<sub>90</sub>, MIC range (mg/L) and % of *Nocardia* species (no. of isolates) susceptible to 32 antimicrobial agents.

| Antimicrobial(s) <sup>a</sup>       |     | Standard isolates |                   |                    |    | Clinical isolates |                   |            |     | Isolates from sewer rat |                   |           |     | overall rate of sensitive |
|-------------------------------------|-----|-------------------|-------------------|--------------------|----|-------------------|-------------------|------------|-----|-------------------------|-------------------|-----------|-----|---------------------------|
|                                     |     | (65)              |                   |                    |    | (14)              |                   |            |     | (6)                     |                   |           |     |                           |
|                                     |     | MIC <sub>50</sub> | MIC <sub>90</sub> | MIC range          | %  | MIC <sub>50</sub> | MIC <sub>90</sub> | MIC range  | %   | MIC <sub>50</sub>       | MIC <sub>90</sub> | MIC range | %   |                           |
| β-lactam antibiotics                | AMP | >4                | <128              | 0.125->128         | 54 | <32               | >64               | 16->128    | 0   | >32                     | >64               | 32-128    | 0   | 41                        |
|                                     | AMC | >4/2              | <32/16            | <0.25/0.125->32/16 | 60 | <4/2              | >8/4              | 2/1-32/16  | 79  | >8/4                    | >4/2              | 4/2       | 100 | 65                        |
|                                     | FEP | >4                | <64               | <0.125->32         | 62 | >16               | >64               | 2->32      | 36  | >32                     | >32               | >32       | 0   | 53                        |
|                                     | CTX | <4                | <128              | <0.125->256        | 75 | <32               | >256              | 2->256     | 36  | >32                     | <128              | 16-128    | 0   | 63                        |
|                                     | FOX | >16               | >128              | 0.5->256           | 23 | >64               | >256              | 16->256    | 0   | >32                     | <128              | 32-256    | 0   | 18                        |
|                                     | CMZ | >8                | <64               | <0.125->256        | 37 | <32               | >128              | 8->256     | 7   | >8                      | <16               | 8-16      | 33  | 32                        |
|                                     | MEM | <1                | >4                | <0.125-16          | 95 | <4                | <8                | 2-16       | 93  | >4                      | <8                | 4-8       | 100 | 95                        |
|                                     | CRO | >2                | >64               | <0.125->256        | 74 | <16               | >256              | 0.25->256  | 36  | >32                     | >64               | 32-128    | 0   | 63                        |
|                                     | IPM | >0.25             | <16               | <0.125->128        | 83 | <1                | <4                | 0.25-16    | 93  | >2                      | <4                | 2-8       | 83  | 85                        |
| aminoglycoside antibiotics          | AMK | >0.25             | <16               | <0.125->64         | 88 | >0.5              | <2                | 0.5-8      | 100 | >4                      | <8                | 0.5-1     | 100 | 90                        |
|                                     | TOB | <4                | >256              | <0.125->256        | 42 | >16               | >256              | <0.125-256 | 14  | <32                     | <64               | 16-64     | 0   | 34                        |
| fluoroquinolones antibiotics        | CIP | <2                | >16               | <0.125-128         | 35 | >0.5              | <8                | <0.125-16  | 64  | <0.5                    | <1                | 0.25-1    | 100 | 44                        |
|                                     | LVX | >2                | >32               | <0.125->256        | 30 | >0.5              | <4                | 0.25-32    | 79  | >0.25                   | >0.5              | 0.5       | 100 | 43                        |
|                                     | OFX | >4                | <64               | 0.125->64          | 68 | >1                | <8                | 0.5-32     | 71  | >16                     | >32               | 0.5-4     | 83  | 70                        |
|                                     | MXF | <0.5              | <4                | <0.125-32          | 62 | <0.125            | <1                | <0.125-2   | 86  | 0.125                   | 0.125             | ≤0.125    | 100 | 69                        |
| macrolide antibiotics               | CLR | <16               | >256              | <0.125->32         | 35 | >256              | >256              | 4-≥32      | 0   | <64                     | <128              | ≥32       | 0   | 27                        |
|                                     | AZM | >64               | >256              | 0.25->64           | 23 | >64               | >64               | >64        | 0   | >64                     | >64               | >64       | 0   | 18                        |
| oxazolidinone antibiotic            | LZD | >1                | <4                | 0.125-8            | 98 | 0.5               | <4                | 2-8        | 100 | >1                      | <2                | 1-4       | 100 | 98                        |
| tetracycline antibiotics            | MIN | <1                | >2                | <0.125-4           | 54 | >0.5              | <4                | <0.125-4   | 57  | >1                      | <2                | 1-2       | 17  | 52                        |
|                                     | TGC | >4                | >32               | <0.125-64          | 22 | >8                | <128              | 0.25-64    | 14  | >16                     | >32               | 16-32     | 0   | 19                        |
|                                     | DOX | >1                | <8                | <0.125-16          | 32 | <1                | <8                | <0.125-16  | 50  | <4                      | >16               | 2-8       | 0   | 33                        |
| sulfonamide antibiotics             | SXT | >2                | <8                | 0.5-64             | 97 | <4                | <8                | 4-8        | 100 | >4                      | <8                | 8         | 100 | 98                        |
|                                     | SMZ | >64               | >256              | 2->128             | 34 | <128              | >256              | 8->128     | 14  | >128                    | >128              | >128      | 0   | 28                        |
| clindamycin                         | CLI | <128              | >256              | <0.125->64         | 5  | >32               | >64               | 8-64       | 0   | >64                     | >64               | >64       | 0   | 4                         |
| vancomycin                          | VAN | <128              | >256              | 0.5->256           | 2  | <16               | >256              | 1->256     | 43  | >2                      | <8                | 1-8       | 33  | 11                        |
| classic antituberculous antibiotics | INH | >256              | >256              | >256               | 0  | >256              | >256              | >256       | 0   | >256                    | >256              | >256      | 0   | 0                         |
|                                     | RIF | >256              | >256              | <0.125->256        | 8  | >256              | >256              | >256       | 0   | >256                    | >256              | >256      | 0   | 6                         |
|                                     | ETH | >128              | >256              | 0.25->256          | 5  | <256              | >256              | 64->256    | 0   | >256                    | >256              | >256      | 0   | 4                         |
|                                     | CLO | <2                | >256              | <0.125->256        | 54 | >32               | >256              | 0.25->256  | 21  | >16                     | >128              | 1-256     | 17  | 46                        |
|                                     | GEN | >4                | >128              | <0.125->256        | 45 | >32               | >128              | 2-256      | 7   | >32                     | >64               | 32-128    | 0   | 36                        |
|                                     | KAN | <32               | >256              | <0.125->256        | 31 | <256              | >256              | 128->256   | 0   | <128                    | <256              | 128-256   | 0   | 24                        |
|                                     | STR | >8                | <128              | 0.25-256           | 26 | <64               | <256              | 16->256    | 0   | <32                     | <64               | 16-64     | 0   | 20                        |

<sup>a</sup> AMP, ampicillin; AMC, amoxicillin-clavulanic acid; FEP, cefepime; CTX, cefotaxime; FOX, ceftaxime; CMZ, cefmetazole; MEM, meropenem; CRO, ceftriaxone; IPM, imipenem; AMK, amikacin; TOB, tobramycin; CIP, ciprofloxacin; LVX, levofloxacin; OFX, ofloxacin; MXF, moxifloxacin; CLR, clarithromycin; AZM, azithromycin; LZD, linezolid; MIN, minocycline; TGC, tigecycline; DOX,

doxycycline; SXT, trimethoprim-sulfamethoxazole; SMZ, sulfamethoxazole; CLI, clindamycin; VAN, vancomycin; INH, isoniazid; RIF, rifampicin; ETH, ethambutol; CLO, clofazimine; GEN, gentamicin; KAN, kanamycin; STR, streptomycin.

Table S3-1. MIC range (mg/L) and % of different *Nocardia* species (no. of isolates  $\geq 3$ ) susceptible to 32 antimicrobial agents.

| MIC/MIC range and % susceptible for species (type drug pattern) (no. of isolates $\geq 3$ ) |                              |     |                          |     |                                |     |                        |     |                        |     |
|---------------------------------------------------------------------------------------------|------------------------------|-----|--------------------------|-----|--------------------------------|-----|------------------------|-----|------------------------|-----|
| Antimicrobial(s) <sup>a</sup>                                                               | <i>N. farcinica</i> (V) (11) |     | <i>N. nova</i> (III) (5) |     | <i>N. otitidiscauiarum</i> (5) |     | <i>N. veterana</i> (5) |     | <i>N. africana</i> (4) |     |
|                                                                                             | MIC range                    | %   | MIC range                | %   | MIC range                      | %   | MIC range              | %   | MIC range              | %   |
| AMK                                                                                         | 0.5–2                        | 100 | 0.125–0.25               | 100 | 0.5–1                          | 100 | 0.125–0.25             | 100 | 0.125–1                | 100 |
| AMC                                                                                         | 1/0.5–4/2                    | 100 | 16/8–32/16               | 0   | 32/16                          | 0   | 4/2–32/16              | 40  | 4/2–16/8               | 75  |
| CRO                                                                                         | 2–256                        | 30  | 1–8                      | 100 | >256                           | 0   | 1–4                    | 100 | 4–16                   | 75  |
| CIP                                                                                         | <0.125–8                     | 55  | 4–8                      | 0   | 1–4                            | 20  | 4–16                   | 0   | 4–8                    | 0   |
| CLR                                                                                         | 16–>32                       | 0   | 2                        | 100 | >32                            | 0   | <0.125–0.5             | 100 | <0.125–8               | 75  |
| IPM                                                                                         | 0.25–2                       | 100 | <0.125–0.25              | 100 | >128                           | 0   | $\leq 0.125$           | 100 | <0.125–1               | 100 |
| LZD                                                                                         | 2–4                          | 100 | 2–4                      | 100 | 2–4                            | 100 | 2                      | 100 | 2–8                    | 100 |
| MIN                                                                                         | 1–2                          | 80  | 2–4                      | 0   | 0.25–4                         | 60  | 2–4                    | 0   | 4                      | 0   |
| MXF                                                                                         | <0.125–1                     | 100 | 2                        | 0   | 0.5–1                          | 100 | 1–2                    | 20  | 2                      | 0   |
| SXT                                                                                         | 2–8                          | 100 | 4                        | 100 | 4–8                            | 100 | 4–8                    | 100 | 2–4                    | 100 |
| SMZ                                                                                         | 64–>128                      | 0   | 32–>128                  | 17  | $\geq 128$                     | 0   | 16–>128                | 40  | $\geq 128$             | 0   |
| TOB                                                                                         | 16–64                        | 0   | 8–128                    | 0   | 4–32                           | 20  | 8–64                   | 0   | 32–128                 | 0   |
| FEP                                                                                         | 4–>32                        | 10  | 1–8                      | 100 | 16–>32                         | 0   | 1–8                    | 100 | 8–16                   | 50  |
| CTX                                                                                         | 2–>256                       | 27  | 1–8                      | 100 | 64–>256                        | 0   | 1–8                    | 100 | 4–8                    | 100 |
| DOX                                                                                         | 1–4                          | 9   | 4–16                     | 0   | 0.25–2                         | 80  | 2–16                   | 0   | 8–16                   | 0   |
| AMP                                                                                         | 16–64                        | 0   | 0.5–2                    | 100 | 4–>128                         | 20  | 0.5–2                  | 100 | 1–16                   | 75  |
| GEN                                                                                         | 32–128                       | 0   | 4–16                     | 40  | 0.5–1                          | 100 | 2–64                   | 40  | 8–64                   | 0   |
| CLI                                                                                         | >64                          | 0   | 2–4                      | 0   | 8–>64                          | 0   | 0.25–8                 | 20  | 2–>64                  | 0   |
| TGC                                                                                         | 16–64                        | 0   | 16–32                    | 0   | 1–4                            | 60  | 16–32                  | 0   | 16–32                  | 0   |
| VAN                                                                                         | 2–>256                       | 9   | 32–>256                  | 0   | 128–>256                       | 0   | 16–>256                | 0   | >256                   | 0   |
| KAN                                                                                         | 128–256                      | 0   | 16–32                    | 0   | 0.25–0.5                       | 100 | 4–64                   | 40  | 4–128                  | 50  |
| LVX                                                                                         | 0.25–4                       | 45  | 16                       | 0   | 1–4                            | 20  | 16–32                  | 0   | 8–16                   | 0   |
| CLO                                                                                         | 1–>256                       | 9   | 64–256                   | 0   | <0.125–>256                    | 20  | <0.125–128             | 60  | <0.125–0.5             | 100 |
| AZM                                                                                         | >64                          | 0   | 0.125–1                  | 100 | $\geq 64$                      | 0   | 0.5–8                  | 80  | 0.5–64                 | 75  |
| OFX                                                                                         | 0.5–8                        | 36  | 32–64                    | 0   | 2–8                            | 0   | 32–64                  | 0   | 32–64                  | 0   |
| RIF                                                                                         | >256                         | 0   | >256                     | 0   | >256                           | 0   | >256                   | 0   | >256                   | 0   |
| INH                                                                                         | >256                         | 0   | >256                     | 0   | >256                           | 0   | >256                   | 0   | >256                   | 0   |
| STR                                                                                         | 8–64                         | 0   | 1–16                     | 60  | 16–64                          | 0   | 8–64                   | 0   | 2–32                   | 75  |
| ETH                                                                                         | 32–>256                      | 0   | $\geq 256$               | 0   | $\geq 256$                     | 0   | 64–>256                | 0   | >256                   | 0   |
| FOX                                                                                         | 8–256                        | 9   | 16–64                    | 0   | 16–>256                        | 0   | 16–32                  | 0   | 16–64                  | 0   |
| MEM                                                                                         | 2–8                          | 100 | 0.25–1                   | 100 | 0.25–16                        | 60  | <0.125–0.5             | 100 | 0.25–2                 | 100 |
| CMZ                                                                                         | 4–32                         | 27  | 8–16                     | 40  | 16–>256                        | 0   | 8–32                   | 20  | 16–32                  | 0   |

Table S3-1. (continued)

| <i>N. brasiliensis</i> (4) |     | <i>N. carnea</i> (3) |     | <i>N. asteroides</i> (VI) (3) |     | <i>N. amikacinitolerans</i> (3) |     | <i>N. cyriacigeorgica</i> (3) |     |
|----------------------------|-----|----------------------|-----|-------------------------------|-----|---------------------------------|-----|-------------------------------|-----|
| MIC range                  | %   | MIC range            | %   | MIC range                     | %   | MIC range                       | %   | MIC range                     | %   |
| 0.5-1                      | 100 | <0.125-1             | 100 | <0.125-1                      | 100 | ≥64                             | 0   | 0.25-0.5                      | 100 |
| 1/0.5-2/1                  | 100 | 2/1                  | 100 | >32/16                        | 0   | <0.25/0.125                     | 100 | 8/4-16/8                      | 33  |
| 32                         | 25  | <0.125-0.5           | 100 | 2-4                           | 100 | <0.125-0.25                     | 100 | 2                             | 100 |
| 1-2                        | 25  | 0.125                | 100 | 8                             | 0   | 4-8                             | 0   | 8-16                          | 0   |
| ≥32                        | 0   | 0.5-32               | 67  | 32                            | 0   | >32                             | 0   | >32                           | 0   |
| 16                         | 0   | ≤0.125               | 100 | 0.25-0.5                      | 100 | 0.25-0.5                        | 100 | 1                             | 100 |
| 2                          | 100 | 0.25-1               | 100 | 1-2                           | 100 | 4                               | 100 | 4                             | 100 |
| 0.5-1                      | 75  | <0.125-0.5           | 100 | 0.5-1                         | 100 | 0.5-1                           | 100 | 2-4                           | 0   |
| 0.25                       | 100 | ≤0.125               | 100 | 1                             | 100 | 2-4                             | 0   | 2                             | 0   |
| 0.5-1                      | 100 | 4                    | 100 | 4                             | 100 | 0.5-4                           | 100 | 2                             | 100 |
| 8-64                       | 75  | 8-32                 | 100 | 4-64                          | 67  | 32-≥128                         | 33  | 16->128                       | 33  |
| <0.125-0.25                | 100 | <0.125               | 100 | <0.125-64                     | 67  | 2-8                             | 67  | <0.125                        | 100 |
| 8->32                      | 25  | <0.125-1             | 100 | 16                            | 0   | 0.5-2                           | 100 | 4-8                           | 100 |
| 4->256                     | 50  | <0.125-0.5           | 100 | 4-8                           | 100 | <0.125-0.5                      | 100 | 2-4                           | 100 |
| 2-4                        | 0   | 0.25-0.5             | 100 | 1-2                           | 67  | 1                               | 100 | 1-2                           | 33  |
| 16-128                     | 0   | 0.125-1              | 100 | 16-32                         | 0   | 0.125-0.5                       | 100 | 4-128                         | 33  |
| <0.125-1                   | 100 | <0.125               | 100 | <0.125-128                    | 100 | 16-125                          | 0   | 1-2                           | 100 |
| ≥64                        | 0   | >64                  | 0   | 32->64                        | 0   | >64                             | 0   | >64                           | 0   |
| 1-2                        | 50  | 0.5-4                | 67  | 1-64                          | 33  | 8-16                            | 0   | 1-8                           | 33  |
| ≥256                       | 0   | 4-32                 | 0   | 16->256                       | 0   | 4-32                            | 0   | 16-64                         | 0   |
| 128->256                   | 0   | <0.125               | 100 | <0.125->256                   | 33  | 128->256                        | 0   | 64->256                       | 0   |
| 2-8                        | 0   | 0.25-0.5             | 100 | 0.5-4                         | 33  | 4-8                             | 0   | 8                             | 0   |
| <0.125-0.25                | 100 | <0.125-0.25          | 100 | <0.125->256                   | 33  | 64-256                          | 0   | 32-256                        | 0   |
| ≥64                        | 0   | 8-64                 | 0   | 64                            | 0   | >64                             | 0   | >64                           | 0   |
| 4-16                       | 0   | 0.5                  | 100 | 1-16                          | 33  | 8-16                            | 0   | 8-16                          | 0   |
| 128->256                   | 0   | 16-32                | 0   | >256                          | 0   | 0.5-1                           | 100 | >256                          | 0   |
| >256                       | 0   | >256                 | 0   | >256                          | 0   | >256                            | 0   | >256                          | 0   |
| 32-256                     | 0   | 0.25-16              | 67  | 2-64                          | 33  | 32-128                          | 0   | 1-2                           | 100 |
| 64-256                     | 0   | 0.25-64              | 67  | 64-128                        | 0   | 64-256                          | 0   | 128                           | 0   |
| 16-128                     | 0   | 1-8                  | 100 | 4-32                          | 33  | 2                               | 100 | 32-128                        | 0   |
| 1-16                       | 75  | 0.125-0.5            | 100 | 0.25-4                        | 100 | 0.25-2                          | 100 | 0.5-4                         | 100 |
| 8-64                       | 25  | 1-2                  | 100 | 2-16                          | 67  | 0.5-16                          | 67  | 1-32                          | 33  |

Table S3-2. MIC range (mg/L) of different *Nocardia* species (no. of isolates <3) to 32 antimicrobial agents\*.

| Antimicrobial(s) | <i>N. beijingensis</i> | <i>N. wallacei</i> | <i>N. asiatica</i> | <i>N. transvalensis</i> | <i>N. novocastrense</i> | <i>N. jinanensis</i> | <i>N. pseudobrasiliensis</i> | <i>N. brevicatenata</i> | <i>N. kruczakiae</i> |
|------------------|------------------------|--------------------|--------------------|-------------------------|-------------------------|----------------------|------------------------------|-------------------------|----------------------|
|                  | (2)                    | (2)                | (2)                | (IV) (2)                | (1)                     | (1)                  | (1)                          | (II) (1)                | (1)                  |
| AMK              | <0.125                 | >64                | <0.125             | 8/64                    | 0.125                   | <0.125               | 32                           | <0.125                  | 0.5                  |
| AMC              | 2/1/8/4                | 2/1/4/2            | ≥32/16             | ≥32/16                  | 4/2                     | 8/4                  | 16/8                         | 0.5/0.25                | 32/16                |
| CRO              | <0.125                 | 2                  | 0.25/2             | 0.5/2                   | 1                       | 2                    | >256                         | 4                       | 2                    |
| CIP              | 2/64                   | 0.5/1              | 64/128             | 0.25/0.5                | 16                      | <0.125               | <0.125                       | 4                       | 8                    |
| CLR              | 4/16                   | ≥32                | ≥32                | 0.5/8                   | 2                       | >32                  | <0.125                       | 4                       | <0.125               |
| IPM              | 0.125/0.25             | 8/16               | 0.25/0.5           | 2                       | 0.5                     | 16                   | 2                            | 0.25                    | <0.125               |
| LZD              | 2                      | 2                  | 2                  | 0.125/2                 | 4                       | 1                    | 1                            | 0.5                     | 2                    |
| MIN              | <0.125/2               | 1/2                | <0.125             | 0.5/2                   | 0.5                     | 2                    | 4                            | <0.125                  | 2                    |
| MXF              | 1/32                   | 0.125              | 32                 | <0.125                  | 0.5                     | <0.125               | <0.125                       | 0.25                    | 2                    |
| SXT              | 1                      | 64                 | 4                  | 2                       | 8                       | 4                    | 16                           | 4                       | 4                    |
| SMZ              | 4/>128                 | >128               | 16                 | 16/>128                 | >128                    | 2                    | 64                           | 16                      | 64                   |
| TOB              | 0.5/1                  | >256               | 4                  | 128/256                 | <0.125                  | <0.125               | 1                            | <0.125                  | 64                   |
| FEP              | 0.25                   | 16                 | 4/16               | 1/8                     | 4                       | 4                    | 32                           | 8                       | 1                    |
| CTX              | <0.125                 | 2/4                | 2/4                | 0.5/2                   | 4                       | 4                    | >256                         | 4                       | 1                    |
| DOX              | <0.125/4               | 2/8                | 0.5                | 2-4                     | 1                       | 2                    | 8                            | <0.125                  | 8                    |
| AMP              | 0.25/4                 | 64                 | 4/8                | 64/>128                 | 0.5                     | 2                    | 32                           | 1                       | 0.5                  |
| GEN              | 1/2                    | ≥256               | 1/2                | 128/256                 | 1                       | <0.125               | 16                           | 2                       | 8                    |
| CLI              | 32/>64                 | >64                | >64                | 1/>64                   | >64                     | >64                  | 8                            | >64                     | 1                    |
| TGC              | <0.125/8               | 16/64              | 2/4                | 1/8                     | 2                       | 4                    | 16                           | 0.5                     | 32                   |
| VAN              | 0.5/128                | >256               | >256               | ≥256                    | 8                       | 4                    | 16                           | 32                      | 128                  |
| KAN              | 1/4                    | 128/>256           | 32                 | ≥256                    | 2                       | <0.125               | >256                         | 0.25                    | 4                    |
| LVX              | 4-128                  | 0.5/1              | ≥256               | 0.25                    | 4                       | <0.125               | 0.25                         | 0.5                     | 16                   |
| CLO              | <0.125/0.5             | 1                  | <0.125/0.25        | <0.125/0.25             | <0.125                  | <0.125               | 128                          | <0.125                  | <0.125               |
| AZM              | ≥64                    | 64                 | 64                 | 8/>64                   | 32                      | >64                  | 0.25                         | 64                      | 0.5                  |
| OFX              | 8/>64                  | 1                  | >64                | 0.5                     | 8                       | 0.125                | 0.5                          | 1                       | 64                   |
| RIF              | >256                   | >256               | >256               | 128/>256                | >256                    | >256                 | <0.125                       | >256                    | >256                 |
| INH              | >256                   | >256               | >256               | >256                    | >256                    | >256                 | >256                         | >256                    | >256                 |
| STR              | 16/32                  | 256                | 8/16               | 16/256                  | 8                       | 128                  | 4                            | 0.5                     | 64                   |
| ETH              | 16                     | >256               | 8                  | 4/256                   | 64                      | >256                 | 32                           | >256                    | >256                 |
| FOX              | 0.5/16                 | 128/256            | 8                  | 64/128                  | 64                      | >256                 | 4                            | 32                      | 16                   |
| MEM              | 0.5/2                  | 2                  | 1/2                | 1                       | 2                       | 4                    | 1                            | 0.5                     | 1                    |
| CMZ              | 0.125/8                | 32/64              | 8                  | 16/64                   | 16                      | 128                  | 4                            | 16                      | 16                   |

Table S3-2. (continued)

| <i>N. aobensis</i> | <i>N. blacklockiae</i> | <i>N. paucivorans</i> | <i>N. pneumoniae</i> | <i>N. caishijienensis</i> | <i>N. mexicana</i> |
|--------------------|------------------------|-----------------------|----------------------|---------------------------|--------------------|
| (1)                | (1)                    | (II) (1)              | (1)                  | (1)                       | (1)                |
| <b>0.5</b>         | >64                    | <b>&lt;0.125</b>      | <b>0.25</b>          | <b>0.125</b>              | <b>8</b>           |
| 32/16              | <b>2/1</b>             | <b>4/2</b>            | 16/8                 | <b>8/4</b>                | 16/8               |
| <b>0.5</b>         | <b>0.5</b>             | <b>1</b>              | <b>&lt;0.125</b>     | <b>4</b>                  | <b>0.5</b>         |
| 4                  | <b>0.25</b>            | <b>&lt;0.125</b>      | 64                   | <b>0.25</b>               | <b>1</b>           |
| <b>&lt;0.125</b>   | 2                      | 0.25                  | <b>0.25</b>          | <b>2</b>                  | 8                  |
| <b>&lt;0.125</b>   | <b>2</b>               | <b>0.25</b>           | <b>0.25</b>          | <b>0.5</b>                | <b>4</b>           |
| <b>0.5</b>         | <b>4</b>               | <b>1</b>              | <b>4</b>             | <b>1</b>                  | <b>1</b>           |
| <b>0.5</b>         | 2                      | <b>&lt;0.125</b>      | <b>1</b>             | <b>0.25</b>               | <b>1</b>           |
| 2                  | <b>&lt;0.125</b>       | <b>&lt;0.125</b>      | 8                    | <b>&lt;0.125</b>          | <b>0.5</b>         |
| <b>2</b>           | <b>2</b>               | <b>0.5</b>            | <b>0.5</b>           | <b>2</b>                  | <b>2</b>           |
| <b>16</b>          | >128                   | 64                    | <b>16</b>            | <b>16</b>                 | 64                 |
| >256               | <b>2</b>               | <b>&lt;0.125</b>      | <b>0.5</b>           | <b>&lt;0.125</b>          | >256               |
| <b>2</b>           | <b>4</b>               | <b>2</b>              | <b>1</b>             | <b>8</b>                  | <b>2</b>           |
| <b>1</b>           | <b>2</b>               | <b>1</b>              | <b>&lt;0.125</b>     | <b>8</b>                  | <b>1</b>           |
| 2                  | 4                      | <b>&lt;0.125</b>      | 4                    | <b>0.25</b>               | 4                  |
| <b>2</b>           | 32                     | <b>4</b>              | <b>8</b>             | <b>1</b>                  | 128                |
| 32                 | >256                   | 8                     | <b>0.5</b>           | <b>1</b>                  | >256               |
| <b>0.5</b>         | >64                    | >64                   | >64                  | <b>&lt;0.125</b>          | >64                |
| 16                 | 32                     | <b>0.5</b>            | 2                    | <b>1</b>                  | 2                  |
| 32                 | >256                   | 32                    | 128                  | 16                        | 64                 |
| 128                | 128                    | <b>&lt;0.125</b>      | <b>4</b>             | 64                        | >256               |
| 8                  | <b>0.5</b>             | <b>&lt;0.125</b>      | 256                  | <b>0.25</b>               | 2                  |
| <b>0.25</b>        | <b>0.5</b>             | <b>0.5</b>            | <b>&lt;0.125</b>     | <b>0.25</b>               | <b>&lt;0.125</b>   |
| <b>0.5</b>         | >64                    | >64                   | 64                   | 32                        | 32                 |
| 16                 | <b>1</b>               | <b>0.25</b>           | >64                  | <b>0.5</b>                | 2                  |
| >256               | <b>1</b>               | >256                  | 4                    | 256                       | >256               |
| >256               | >256                   | >256                  | >256                 | >256                      | >256               |
| 128                | <b>0.25</b>            | <b>1</b>              | <b>4</b>             | 128                       | 16                 |
| >256               | 16                     | 32                    | 128                  | 32                        | >256               |
| 128                | <b>8</b>               | <b>8</b>              | 16                   | 64                        | 64                 |
| <b>2</b>           | <b>0.5</b>             | <b>1</b>              | <b>0.5</b>           | <b>8</b>                  | <b>8</b>           |
| 32                 | <b>4</b>               | <b>4</b>              | <b>2</b>             | 32                        | 32                 |

\*bold typeface indicates that the species was susceptible to the antimicrobial drug.



## Text S1. Step-by-step procedure of Antimicrobial susceptibility test

Susceptibility testing was performed using the Mueller–Hinton II broth microdilution method<sup>8,9</sup>. All tests for each strain were conducted twice at least. The isolates were grown on microplates. The inocula were prepared from actively growing bacteria collected from brain-heart infusion agar. The strains were then adjusted with saline to a bacterial cell density of  $1.5 \times 10^8$  CFU/mL (0.5 McFarland standard), and then diluted 1:200 with Mueller–Hinton II Supplement (MH II-S) (MH-II broth + 5% ADC). Antibiotics were serially diluted two fold in 100  $\mu$ L of MH-II-S. The range of antibiotic concentrations was 256–0.125 mg/L, except for: imipenem, linezolid, sulfamethoxazole, and ampicillin (128–0.125 mg/L); amikacin, moxifloxacin, clindamycin, tigecycline, azithromycin, ofloxacin, and meropenem (64–0.125 mg/L); amoxicillin-clavulanic acid (32/16–0.25/0.125 mg/L); and clarithromycin and cefepime (32–0.125 mg/L). The final volume in each well was 200  $\mu$ L (100  $\mu$ L of bacterial suspension and 100  $\mu$ L of antibiotic solution). The overall performance of the susceptibility test system was monitored by testing the three quality control bacterial strains in each analysis.

A drug-free control well (MH II-S + inoculum) was used to determine when to add the Alamar Blue. A medium (MH II-S) without inoculum control well was used to measure the interference of MH II-S with the Alamar Blue. We also used a series of control wells in which all of the antibiotics, along their respective concentration gradients, were mixed with MH II-S to determine the degree of interference with the color of the Alamar Blue. The plates were sealed in individual Ziploc bags and

incubated at 37 °C.

The indicator consisted of 20 µL of Alamar Blue and 50 µL of sterile 5% Tween-80. After 24 h, we used the indicator to examine the first drug-free growth control well and then re-incubated the plates for 8–12 h. Alamar Blue is a redox indicator that is used to evaluate metabolic function and bacterial health. A color change from blue to pink indicates bacterial growth. If the control turned pink completely, all of the other wells received the indicator. We recorded the colors of all the wells after a further 24 h of incubation. If the first drug-free growth control well did not turn pink, we used the indicator to examine the second drug-free control well and then repeated the above steps. The MIC was defined as the lowest concentration of a drug capable of inhibiting the visible growth of the tested isolates. We recorded the MIC as the lowest concentration of the drug that showed no color change. Each MIC was read on the 3<sup>rd</sup> or 2<sup>nd</sup> day. The MIC results for each drug for each isolate are the mean value from two tests. The MIC breakpoints of the drugs, indicating sensitivity, moderate susceptibility, and resistance, were interpreted according to the approved guidelines established by the National Committee for Clinical Laboratory Standards<sup>10</sup>, except for: clofazimine (Table 1), where the approximations refer to the published breakpoints for *Mycobacterium tuberculosis*<sup>20</sup>; moxifloxacin, clindamycin, tigecycline, and vancomycin, which were assessed according to the method of Larruskain *et al.*<sup>13</sup>; and kanamycin (Table 1), which was assessed according to the approximations for the same class of antibiotics, as there are currently no CLSI interpretive criteria (Table 1).
